# Supplementary material for: One-step fabrication of silver nanosphere-wetted carbon nanotube electrodes via electric-field-driven combustion waves for high-performance flexible supercapacitors
Source: Royal Society of Chemistry journal article supplement (doi:10.1039/c9ta00992b), 2019-01-01
Supplement: c9ta00992b1.pdf [file c9ta00992b1.pdf]

1 [Supporting Information]

2

3 **One-step fabrication of silver nanosphere-wetted carbon nanotube**  
4 **electrodes via electric-field-driven combustion wave for high-performance**  
5 **flexible supercapacitors**

6

7 *Taehan Yeo, Jaeho Lee, Dongjoon Shin, Seonghyun Park, Hayoung Hwang, and Wonjoon*  
8 *Choi\**

9

10

11 School of Mechanical Engineering, Korea University, Seoul 136-701, Korea

12

13

14

15 \*Author to whom correspondence should be addressed.

16 E-mail: [wojchoi@korea.ac.kr](mailto:wojchoi@korea.ac.kr), Phone: +82 2 3290 5951, Fax: +82 2 926 9290

17

18

19 **Keywords:** combustion; supercapacitor; silver/silver oxides; carbon nanotubes; wetted hybrids;  
20 chemical synthesis

21

22

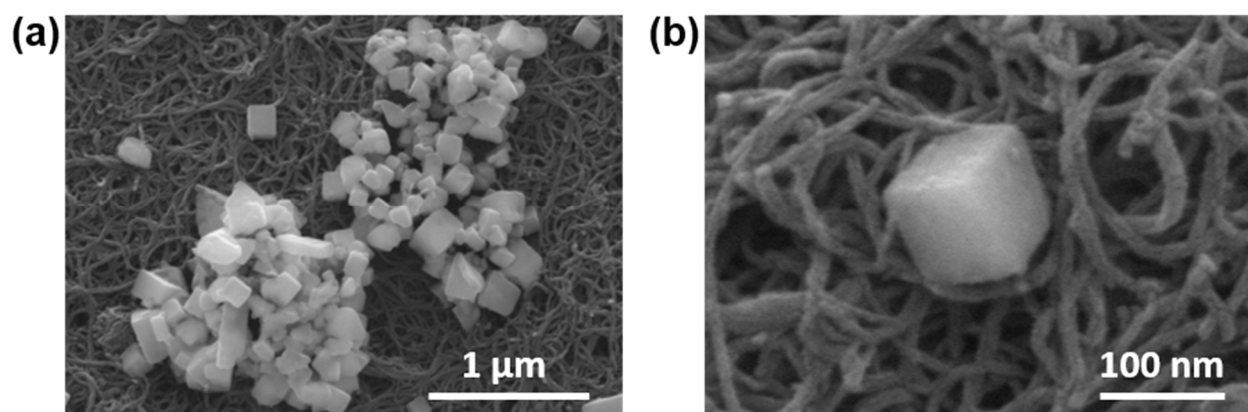

1  
2  
3  
4  
5  
6  
7  
8  
9  
10  
11  
12  
13

**Fig. S1. Hybrid structures of Ag<sub>2</sub>O/Ag and MWCNTs before the application of E-CWs.**

Scanning electron microscopy (SEM) images of (a) as-prepared Ag<sub>2</sub>O/MWCNTs and (b) interfacial contacts between Ag<sub>2</sub>O and MWCNTs before the application of E-CWs

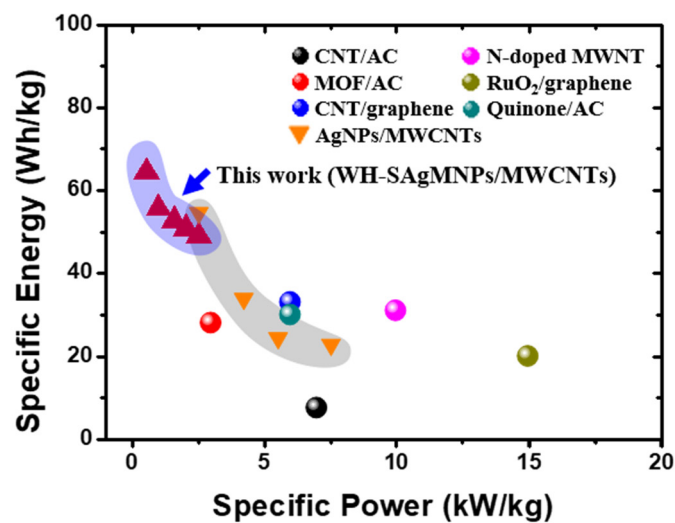

1  
2  
3  
4  
5  
6  
7  
8  
9  
10  
11  
12  
13  
14  
15  
16  
17  
18  
19

**Fig. S2. Ragone plots of the specific energy and power of flexible all-solid-state symmetric supercapacitors based on WH-SAgMNPs/MWCNTs electrodes with different hybrid electrodes of metal oxides and carbon-based materials.<sup>1,2</sup>** The specific energy and power density reported in this work were obtained from the full-cell of WH-SAgMNPs/MWCNTs electrode/gel-type electrolyte/ WH-SAgMNPs/MWCNTs electrode fabricated by 150 V E-CWs.

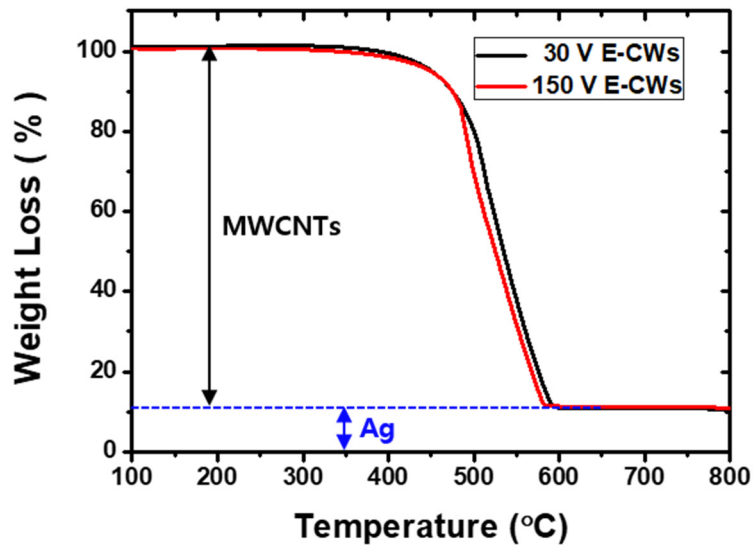

1  
2  
3  
4  
5  
6  
7  
8  
9  
10  
11  
12  
13  
14  
15  
16  
17  
18

**Fig. S3. Thermogravimetric analysis (TGA) of hybrids of AgMNPs/MWCNTs, fabricated by 30 V and 150 V E-CWs.**

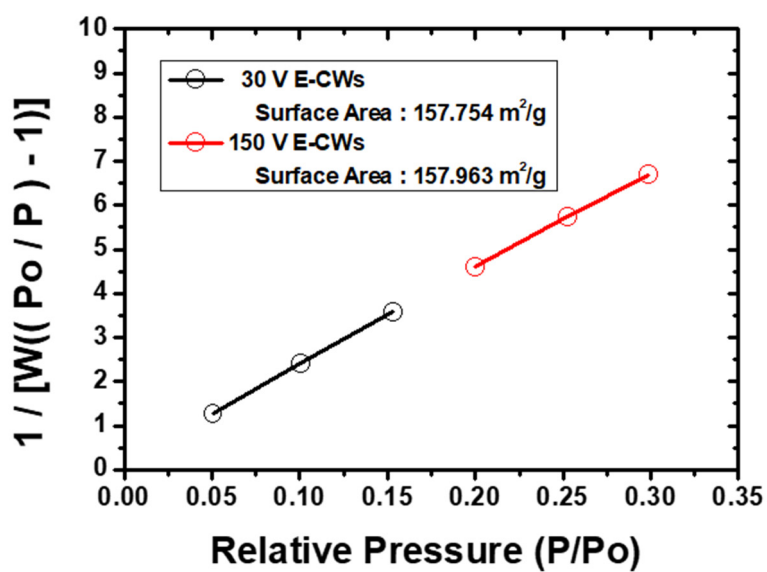

1

2 **Fig. S4. BET (Brunauer–Emmett–Teller) specific surface areas of hybrids of**  
 3 **AgMNPs/MWCNTs, fabricated by 30 V and 150 V E-CWs.**

4

5

6

7

8

9

10

11

12

13

14

15

16

17

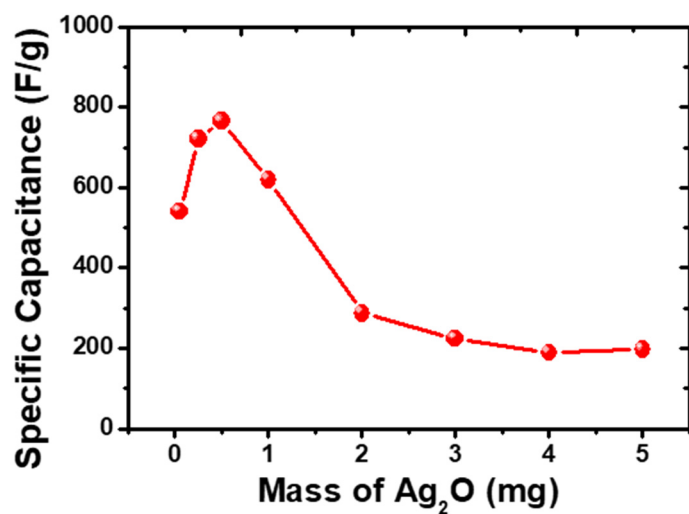

1  
2  
3  
4  
5  
6  
7  
8  
9  
10  
11  
12  
13  
14  
15  
16  
17  
18  
19

**Fig. S5. Maximum specific capacitances of WH-SAgMNPs/MWCNTs electrodes in different mass of Ag<sub>2</sub>O (0.05, 0.25, 0.5, 1, 2, 3, 4 and 5 mg) at the scan rate of 10 mV/s. The mass of the MWCNTs was 20 mg.**

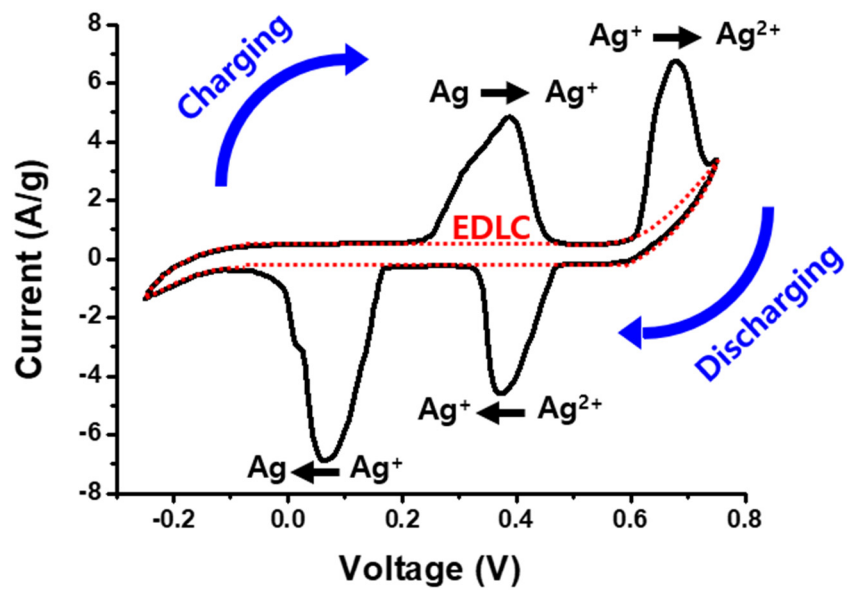

1  
2  
3  
4  
5  
6  
7  
8  
9  
10  
11  
12  
13  
14  
15  
16  
17

**Fig. S6. Classification of dominant charge-discharge mechanisms in CV curves of WH-SAgMNPs/MWCNTs electrodes.**

## 1 **Ragone plots for flexible all-solid-state symmetric supercapacitors based on the WH-** 2 **SAgMNPs/MWCNTs electrodes**

3 The Ragone plots for flexible all-solid-state symmetric supercapacitors based on the WH-  
4 SAgMNPs/MWCNTs electrodes show the overall comparison of the energy storage  
5 performances of different hybrid electrodes of metal/metal oxides and carbon-based materials,  
6 in terms of specific energy and power density (**Fig. S2**).<sup>1, 2</sup> The specific energy and power  
7 density reported in this work were obtained from the full-cell of the WH-SAgMNPs/MWCNTs  
8 electrode/gel-type electrolyte/WH-SAgMNPs/MWCNTs electrode fabricated by 150 V E-CWs.  
9 The specific energy ( $\sim 64.5$  Wh/kg) and areal energy density ( $\sim 8.39$   $\mu\text{Wh}/\text{cm}^2$ ) were much  
10 higher than other full-cells using hybrid electrodes composed of other metal/metal  
11 oxides/carbon-based materials, while the specific power exhibited moderate performance  
12 compared to the others, owing to the relatively slow charge-discharge rates of the metallic  
13 electrodes. Because the electrochemical reactions of the WH-SAgMNPs/MWCNTs electrode  
14 mainly use the redox reaction of Ag in the metallic supercapacitors, one charge-discharge cycle  
15 intrinsically requires more time than metal oxide-based supercapacitors (**Fig. S6**). However,  
16 the obtained specific energy from the H-Ag/MWCNTs fabricated by E-CWs significantly  
17 surpasses other supercapacitors. These characteristics imply that the metallic supercapacitor  
18 takes a long time for charging at certain voltages and discharging in the constant currents. This  
19 outstanding specific energy and comparable specific power indicates that the developed WH-  
20 SAgMNPs/MWCNTs as the metallic electrodes for the supercapacitors can fill the gap between  
21 conventional supercapacitors and batteries.



1

## References

- 2 1. A. Borenstein, O. Hanna, R. Attias, S. Luski, T. Brousse and D. Aurbach, *Journal of*  
3 *Materials Chemistry A*, 2017, **5**, 12653-12672.
- 4 2. B. Pandit and B. R. Sankapal, *New Journal of Chemistry*, 2017, **41**, 10808-10814.

5
